# Pathogen dependence and inter-individual variability of post-infection reproductive fitness in *Drosophila melanogaster*

Aabeer Basu<sup>1,2</sup>, Vandana Gupta<sup>1,3</sup>, Nagaraj Guru Prasad<sup>1,2</sup>

<sup>1</sup>Department of Biological Sciences, Indian Institute of Science Education and Research Mohali, India

<sup>2</sup>Correspondance: aabeerkbasu@gmail.com, prasad@iisermohali.ac.in

<sup>3</sup>Present address: Institute of Evolutionary Sciences, University of Montpellier, France

Short title: Post-infection reproductive investment in *Drosophila melanogaster* females.

Author contribution: Conceptualization & Methodology, AB; Investigation, AB and VG; Data curation, Formal analysis, Visualization & Writing (first draft), AB; Writing (review and editing), AB, VG, and NGP; Funding acquisition and Supervision, NGP.

Declaration of interests: The authors have no competing interests to declare.

Funding: The study was funded by intramural funding from IISER Mohali, India. AB is supported by Senior Research Fellowship for graduate students from CSIR, Govt. of India. VG is supported by INSPIRE fellowship for undergraduate studies from DST, Govt. of India.

Acknowledgements: We thank Paresh Nath Das for logistical support during execution of the experiments reported in this manuscript. We also thank Aparajita Singh and Rochishnu Dutta for their constructive comments on earlier drafts of the manuscript. We thank Dr. E Sucena and Tania Paulo (Instituto Gulbenkian Ciencia, Portugal) for providing us with the *Serratia marcescens* isolate used in experiments reported in this manuscript.

1 ABSTRACT

2 In the experiments reported in this manuscript, we explore the effect of bacterial infections on  
3 the reproductive output of *Drosophila melanogaster* females. Canonical view of host-  
4 pathogen interactions supposes two possible outcomes. Because of immune defence being an  
5 energy/resource intensive function, an infected female reallocates resources away from  
6 reproductive processes and towards immune defence, therefore compromising its  
7 reproductive output. Alternatively, faced with impending mortality, an infected female  
8 increases its reproductive output to compensate for lost opportunities of future reproduction.  
9 We tested if pathogen identity, infection outcome (survival vs. death), and/or time of death  
10 determines the reproductive output of females infected with three bacterial pathogens. Our  
11 results show that pathogen identity is a reliable predictor of population level response of  
12 infected females but does not reliably predict the behaviour of individual females.  
13 Additionally, females succumbing to infection exhibit greater variability in reproductive  
14 output, compared to both survivors and controls, but this variability is not explained by either  
15 the time of death or the identity of the infecting pathogen. Furthermore, survivors of infection  
16 have reproductive output similar to control females.

17

18 Keywords: *Drosophila melanogaster*, bacterial infection, cost of immunity, terminal investment,  
19 fecundity compensation.

## 20 INTRODUCTION

21 Omnipresence of pathogens/parasites impose a strong selection pressure on hosts to evolve  
22 mechanisms of defense. Such defense mechanisms go far beyond the canonical anatomical  
23 and physiological defenses, and include behavioral strategies that either help alleviate risk of  
24 infection or help mitigate the consequences. Fecundity compensation, that is the post  
25 infection increase in reproductive effort of the host, is one such behavioral defense that helps  
26 hosts maintain their evolutionary fitness [1]. Since increased reproductive effort maximizes  
27 immediate reproductive output at the cost of future chance of reproduction [2], organisms  
28 under benign conditions are expected to pace out their reproductive schedule so as to  
29 maximize their life-time reproductive success [3, 4]. Under circumstances which lead to pre-  
30 mature death, such as a lethal infection, future opportunities of reproduction are compromised  
31 and organisms should, in theory, maximize their immediate reproductive effort [5, 6, 7].  
32 Minchella and Loverde [8] first demonstrated this phenomenon in snails infected with  
33 castrating trematode parasites, where hosts increased their immediate reproductive output in  
34 response to parasitic infection.

35 An infection is also detrimental to the physiology of the host organism. One, mounting an  
36 immune response requires investing energy and resources that could otherwise have been  
37 utilized elsewhere, such as towards reproduction [9, 10, 11]. Two, infection leads to somatic  
38 damage caused by the virulence factors produced by parasites/pathogens [12, 13]. And three,  
39 the immune response mounted by the host often causes collateral somatic damage to the host,  
40 leading to immunopathology [14]. Altogether this suggests that post-infection fitness of hosts  
41 depends on its ability to restrict the systemic propagation of the parasite/pathogen, plus the  
42 host's capacity to continue to maintain physiological functionality during and after recovery  
43 from the infection [15]. Reallocating resources towards mounting an immune defense can  
44 lead to reduced reproductive effort during acute infection [16], and lingering somatic damage

45 can keep reproductive effort to a minimum even after recovery. Fecundity compensation, as  
46 described above, therefore might not be the observed strategy in case of all hosts on every  
47 occasion, and will depend on the features of the specific host-pathogen system being studied.

48 The choice of strategy is likely to depend on the balance between the actual risk of mortality  
49 and the level of somatic damage incurred by the host. A greater risk of mortality should  
50 induce a stronger fecundity compensation response, thereby increasing reproductive effort,  
51 while reproductive effort should decline proportionately with increasing somatic damage.  
52 This balance can vary at the level of individual hosts, causing the mean population behavior  
53 to not be a true reflection of the individual variation in strategies. In fact, increased and  
54 decreased reproductive effort can be viewed as two ends of a continuum – instead of a  
55 dichotomous choice – with each individual host opting for an optimal level of reproductive  
56 effort based on their proximate circumstances.

57 Furthermore, post-infection reduction in host reproductive effort may also be driven by  
58 leeching of resources by the pathogen/parasite, damage to reproductive tissue, or  
59 manipulation of the host physiology by virulence factors produced by the pathogen/parasite  
60 [12]. Thus, post-infection reduction in host reproductive effort can also be a consequence of  
61 the infection process (presence of pathogen), independent of the host response to infection.  
62 To differentiate between post-infection phenotypes that are driven by pathogen manipulation  
63 and those caused by host immune response, previous studies have often used attenuated  
64 pathogens or pathogen-like proxies (bacteria-derived lipopolysaccharides, plastic beads, etc.;  
65 viz. [17]), arguing that such proxies stimulate the host immune system without causing any  
66 infection-related pathologies. While experiments with live pathogens may fail to tease apart  
67 host's response to pathogens from pathogen's manipulation of the host, experiments with  
68 pathogen-like proxies may not induce any fitness effects, both physiological and  
69 reproductive. Furthermore, given that mounting an immune response is costly to the host,

70 hosts are under pressure to evolve mechanisms that differentiate real infections from false  
71 alerts. Thus, results obtained from experiments using attenuated pathogens and proxies are  
72 difficult to interpret. The results of experiments are thus likely to depend upon the exact  
73 biology of the interacting host and pathogen [18], on the physiological capability of the host  
74 to modify its own reproductive effort, and on whether such modifications of reproductive  
75 effort will materialize into benefits in terms of immune function [19], among various other  
76 factors.

77 Previous studies exploring the effect of parasites and pathogens on reproductive behavior of  
78 *Drosophila melanogaster* have reported diverse outcomes, depending partially upon the type  
79 of infectious agent used in the experiments. Flies having successfully survived a parasitoid  
80 attack as larvae have reduced fecundity as adults [20, 21]. Flies infected with *Drosophila C*  
81 Virus exhibit genotype and infection route dependent increase or decrease in reproductive  
82 output [22]. Infection with bacterial pathogens have been demonstrated to increase [23],  
83 reduce [24, 25], or maintain fecundity at an unaltered level [26, 27]. The reasons for this  
84 diversity of outcomes can be multiple, including host susceptibility to pathogens used [28],  
85 infection route [29, 30], genotypic differences in host strains and possible interactions with  
86 environmental factors [31, 32]. Another variable that can affect experimental outcomes is  
87 whether reproductive effort is measured during the acute or the chronic phase of infection  
88 [16]. Infection survivors continue to have a low level of systemic pathogen presence which  
89 have life history consequences [33], although one study reported infection survivors have  
90 similar fecundity as to the controls following recovery from a bacterial infection [34].

91 In this study we challenged *Drosophila melanogaster* females with three pathogenic bacteria,  
92 (a) *Bacillus thuringiensis*, (b) *Pseudomonas aeruginosa*, and (c) *Serratia marcescens*, and  
93 quantified their change in post-infection reproductive output, during the acute phase of  
94 infection, compared to uninfected controls. The aim of the study was to identify the effect of

95 (a) pathogen identity, (b) infection outcome, and (c) time of death, on post-infection  
96 reproductive effort. Pathogen identity represents differences in pathogen virulence factors,  
97 host defence mechanisms, associated costs and immunopathology. Therefore, we expect that  
98 pathogen identity will be a strong determining factor for post-infection reproductive effort.  
99 Infection outcome, that is survival versus death, is the ultimate determinant of fitness at the  
100 level of individual hosts. Hosts that succumb to infection lose out on future opportunities to  
101 reproduce, and therefore are expected to modulate their current reproductive effort differently  
102 than hosts that recover from infection. And finally, individual hosts that die within a short  
103 period following infection are expected to exhibit a greater increase in reproductive effort  
104 compared to hosts that die relatively later.

## 105 RESULTS

106 Using flies from a wild-type, outbred population of *Drosophila melanogaster* (BRB2, see  
107 MATERIALS AND METHODS for more details) we tested for the effect of infection with  
108 different entomopathogenic bacteria on female reproductive fitness. In the first experiment  
109 (figure 1.A), we infected 4-5-day old, inseminated females with three bacteria: *Bacillus*  
110 *thuringiensis* (hereafter *Bt*), *Pseudomonas aeruginosa* (hereafter *Pa*), and *Serratia*  
111 *marcescens* (hereafter *Sm*); we maintained sham-infected and uninfected controls along with  
112 the infected treatments. After infections, the females of each treatment were hosted in vials in  
113 groups of 8, with 10 vials per treatment. The entire experiment was independently replicated  
114 thrice. We monitored the mortality in these vials, every 2 hours, for 24 hours post-infection,  
115 covering the acute phase of infection of all three pathogens. As a measure of reproductive  
116 output, we counted the total number of eggs in each vial, laid by 8 females in 24 hours, and  
117 also the total number of adult progeny that developed from the eggs. This provided us with an  
118 additional measure of fitness: pre-adult viability (proportion of eggs that successfully  
119 developed into adults) of the progeny produced by the infected females.

120 All three pathogens used imposed significant mortality upon the infected females compared  
121 to the uninfected controls (figure 2.A). All females infected with *Sm* (hazard ratio, 95%  
122 confidence interval: 31895.33, 4333.172-234773.08) and *Pa* (HR, 95% CI: 936.66, 130.79-  
123 6707.86) died because of infection within 12 and 24 hours of infection, respectively, while  
124 about half of all females infected with *Bt* (HR, 95% CI: 156.17, 21.80-1118.65) died of  
125 infection within the observation period. Females that were sham-infected (HR, 95% CI: 7.98,  
126 0.99-63.78) did not show significant difference in mortality compared to uninfected controls.

127 Since the lifespan of females in each treatment was different from one another, instead of  
128 directly comparing the absolute number of eggs laid (or progeny produced), we divided the

129 total number of eggs (or progeny) in each vial with the summation of the hours survived  
130 (survival time right-censored at 24 hours post-infection for surviving females) by the females  
131 in that vial (see MATERIALS AND METHODS for more details). We call this the  
132 “standardised reproductive output” and use this value as the subject of analysis. This value is  
133 essentially the measure of the number of eggs (or progeny) per female per hour, when the  
134 females are either infected with pathogens, or sham-infected, or left uninfected.

135 Infection treatment had a significant effect on standardised reproductive output, in terms of  
136 both eggs laid ( $F_{4,147}$ : 58.778,  $p < 2.2 \times 10^{-16}$ ; figure 2.B) and progeny produced ( $F_{4,147}$ : 61.338,  
137  $p < 2.2 \times 10^{-16}$ ; figure 2.C). Post-hoc pairwise comparison using Tukey’s HSD indicated that  
138 *Sm*-infected females (least-square mean, 95% CI: 1.580, 1.408-1.752) laid a significantly  
139 greater number of eggs per female per hour compared to uninfected (LS mean, 95% CI:  
140 0.641, 0.469-0.813), sham-infected (LS mean, 95% CI: 0.653, 0.481-0.825), *Bt*-infected (LS  
141 mean, 95% CI: 0.783, 0.611-0.955), and *Pa*-infected (LS mean, 95% CI: 0.662, 0.490-0.834)  
142 females; the other four experimental treatments did not differ from one another significantly  
143 in terms of number of eggs laid (table S2.A). Similarly, *Sm*-infected females (LS mean, 95%  
144 CI: 1.337, 1.207-1.467) produced a significantly greater number of progeny per female per  
145 hour compared to uninfected (LS mean, 95% CI: 0.589, 0.458-0.719), sham-infected (LS  
146 mean, 95% CI: 0.578, 0.448-0.708), *Bt*-infected (LS mean, 95% CI: 0.663, 0.533-0.794), and  
147 *Pa*-infected (LS mean, 95% CI: 0.545, 0.414-0.675) females; the other four experimental  
148 treatments did not differ from one another significantly in terms of number of progeny  
149 produced (table S2.B).

150 Infection treatment had a significant effect on progeny pre-adult viability ( $F_{4,150}$ : 7.985,  $p =$   
151  $7.304 \times 10^{-6}$ ; figure 2.D). Post-hoc pairwise comparison using Tukey’s HSD indicated that  
152 progeny of *Bt*-infected (LS mean, 95% CI: 0.856, 0.830-0.881), *Pa*-infected (LS mean, 95%  
153 CI: 0.826, 0.800-0.851), and *Sm*-infected (LS mean, 95% CI: 0.855, 0.829-0.880) females



154 had significantly less pre-adult viability compared to progeny of uninfected females (LS  
155 mean, 95% CI: 0.915, 0.889-0.940). There was no difference in viability between progeny of  
156 sham-infected (LS mean, 95% CI: 0.888, 0.863-0.914) and uninfected females. Progeny of  
157 *Pa*-infected females also had less viable compared to progeny of sham-infected females  
158 (table S2.C).

159 To have an estimate of the effect of infecting females with different pathogenic bacteria on  
160 the fitness of their progeny, we measured the early-life fecundity of the progeny, beginning at  
161 day 4-5 of adulthood till day 10-11 of adulthood. We pooled all progenies produced by all 80  
162 females in each treatment (8 females  $\times$  10 vials) and randomly samples 60 males and 60  
163 females, housing them in groups of 6 males and 6 females, setting up 10 vials per *maternal*  
164 treatment. We counted the number of progenies produced by these flies over the next six  
165 days, counting the progenies per day separately, and using that as the subject of analysis. The  
166 day of count (age of the flies) had a significant effect on early-life fecundity of progeny flies  
167 ( $F_{1,897}$ : 488.713,  $p < 2.2 \text{ e-}16$ ; figure S1). Progeny early life fecundity was also significantly  
168 affected by *maternal* treatment ( $F_{4,897}$ : 31.427,  $p < 2.2 \text{ e-}16$ ; figure S1). Post-hoc pairwise  
169 comparison using Tukey's HSD indicated that progeny of *Sm*-infected females (LS mean,  
170 95% CI: 9.56, 8.52-10.06) had significantly lesser fecundity compared to progeny of  
171 uninfected (LS mean, 95% CI: 12.08, 11.04-13.1), sham-infected (LS mean, 95% CI: 12.06,  
172 11.02-13.1), *Bt*-infected (LS mean, 95% CI: 11.59, 10.55-12.6), and *Pa*-infected (LS mean,  
173 95% CI: 11.79, 10.75-12.8) females; the other four *maternal* treatments did not differ from  
174 one another significantly in terms of progeny fecundity (table S2.D).

175 In the above experiment, all females infected with *Sm* and *Pa* died of infection, while only  
176 half of *Bt*-infected females died (figure 2.A). In the follow-up experiment (figure 1.B), we  
177 tested if the outcome of infection (survival vs. death), and the time of death for individual  
178 females, had any effect on reproductive fitness of the females. We housed infected and sham-

179 infected females individually in food vials after infection, and monitored their mortality every  
180 2 hours for 48 hours post-infection. The experiment was independently replicated thrice for  
181 each bacterium used: *Bt*, *Pa*, and *Sm*. We counted the number of progeny produced by  
182 individual females in the span of 48 hours (or till the time the female died) as a measure of  
183 reproductive output. To account for differences in lifespan (number of hours survived by an  
184 infected female; survival time right-censored at 48 hours post-infection for females that  
185 didn't die within that time), we divided the number of progeny produced by a female by the  
186 hours survived, and used this "standardised reproductive output" as subject of analysis. Since  
187 in the first experiment, between treatment differences in standardised reproductive output did  
188 not change based on whether we focused on the number of eggs or the number of progeny, in  
189 this experiment we only counted the number of progeny produced.

190 Similar to the first experiment, only about half of *Bt*-infected females, while all of *Sm*- and  
191 *Pa*-infected females, died due to infection (figure 3.A, 3.D, 3.G). For *Bt*-infected females,  
192 infection outcome did not have a significant effect on mean standardised reproductive output  
193 of the females ( $F_{2,475}$ : 1.4701,  $p = 0.2309$ ); the infected-dead females (LS mean, 95% CI:  
194 0.926, 0.683-1.17), the infected-alive females (LS mean, 95% CI: 0.895, 0.654-1.14), and the  
195 sham-infected females (LS mean, 95% CI: 0.817, 0.577-1.06) had comparable mean  
196 standardised reproductive output (figure 3.B). Infection outcome significantly affected the  
197 variance in standardised reproductive output (Levene's test,  $F_{2,475}$ : 20.808,  $p = 2.174 \times 10^{-9}$ ),  
198 with infected-dead females exhibiting greater variance compared to both infected-alive and  
199 sham-infected females (figure 3.B). Within infected-dead female, time-of-death had a  
200 significant effect on standardised reproductive output ( $F_{1,210}$ : 6.3233,  $p = 0.01267$ ), with  
201 reproductive output having a mild negative correlation with time-to-death (coefficient, 95%  
202 CI: -0.01733, -0.03109 – -0.00355;  $\eta^2$ , 90% CI: 0.03, 0.00-0.08; figure 3.C).

203 For *Pa*-infected females (all of which died following infection; figure 3.D), infection  
204 outcome had a significant effect on standardised reproductive output ( $F_{1,474}$ : 4.3739,  $p =$   
205 0.03703), with infected-dead females (LS mean, 95% CI: 0.743, 0.618-0.867) producing less  
206 number of progeny compared to sham-infected females (LS mean, 95% CI: 0.851, 0.721-  
207 0.981; figure 3.E). Infection outcome significantly affected the variance in standardised  
208 reproductive output (Levene's test,  $F_{2,474}$ : 19.795,  $p = 1.075 \text{ e-}05$ ), with infected-dead females  
209 exhibiting greater variance compared to sham-infected females (figure 3.E). Time-of-death  
210 did not have a significant effect on standardised reproductive output ( $F_{1,357}$ : 0.511,  $p =$   
211 0.4503; figure 3.F).

212 For *Sm*-infected females (all of which died following infection; figure 3.G), infection  
213 outcome had a significant effect on standardised reproductive output ( $F_{1,408}$ : 25.5,  $p = 6.684$   
214  $\text{e-}07$ ), with infected-dead females (LS mean, 95% CI: 1.28, 0.747-1.81) producing greater  
215 number of progeny compared to sham-infected females (LS mean, 95% CI: 0.72, 0.207-1.23;  
216 figure 3.H). Infection outcome significantly affected the variance in standardised  
217 reproductive output (Levene's test,  $F_{2,408}$ : 40.875,  $p = 4.444 \text{ e-}10$ ), with infected-dead females  
218 exhibiting greater variance compared to sham-infected females (figure 3.H). Time-of-death  
219 did not have a significant effect on standardised reproductive output ( $F_{1,290}$ : 0.1505,  $p =$   
220 0.6983; figure 3.I).

## 221 DISCUSSION

222 Fecundity compensation (or, terminal investment) theory in its simplest form hypothesises  
223 that an infected host facing impending death would increase its immediate reproductive effort  
224 to compensate for the loss of future opportunities to reproduce [1, 6, 7]. This hypothesis can  
225 be sub-structured into testable predictions, such as

226 (a) hosts infected with a lethal pathogen would exhibit increased reproductive effort  
227 compared to hosts infected with a pathogen that does not kill all of the infected  
228 individuals;

229 (b) in case of pathogens for which all hosts do not succumb to infection, hosts that die  
230 due to infection would increase their reproductive effort compared to hosts that  
231 survive the infection; and,

232 (c) among hosts that succumb to infection, there will be a negative correlation between  
233 reproductive effort and time of death.

234 Tests of theoretical predictions of change in investment towards reproduction, in response to  
235 various intrinsic and extrinsic variables, hinge on accurate estimation of reproductive effort  
236 (proportion of total available resources that is invested towards reproduction), which is often  
237 difficult to measure [35]. Studies exploring infection induced changes in reproductive  
238 investment subvert this problem using uninfected controls. The uninfected controls represent  
239 an optimal reproductive output given a certain level of accessible resources and residual  
240 reproductive value. Resultantly in such studies a change in reproductive output in infected  
241 hosts compared to controls can be interpreted in light of the fecundity compensation/terminal  
242 investment theory [1, 6, 7]. In this study we use ‘*standardised* reproductive output’ (number  
243 of eggs, or progeny, normalised by the post-infection time-to-death of the females) as a proxy  
244 of reproductive effort. The lifespan of infected females in our experiments vary greatly

245 depending upon the pathogen used for infection (figure 2.A), and thus a direct comparison of  
246 absolute egg or progeny count is not suitable.

247 Briefly, in this study we investigated how infection with three entomopathogenic bacteria,  
248 which differ from one another with respect to the level of mortality imposed on the host,  
249 affect the reproductive output of female *Drosophila melanogaster*. Additionally, we explored  
250 the effect of *maternal* infection on pre-adult viability and early-life fecundity of the progeny.  
251 We further investigated if infection outcome (death vs. survival), and the time of death,  
252 differentially affected the reproductive output of individual infected females. Our key  
253 findings are as follows:

254 (a) The effect of infection on mean reproductive output is pathogen dependent (figures  
255 2.B-C). Females infected with *Serratia marcescens* (hereafter *Sm*) produce a greater  
256 number of eggs (and progeny) compared to uninfected control females, after  
257 accounting for differences in post-infection lifespan. Females infected with *Bacillus*  
258 *thuringiensis* (hereafter *Bt*) or *Pseudomonas aeruginosa* (hereafter *Pa*) have  
259 reproductive output similar to controls.

260 (b) The effect of *maternal* infection on progeny life-history is different for each trait  
261 measured. Progeny pre-adult viability was reduced by infection with all three  
262 pathogens, with the greatest reduction seen in progeny of *Pa*-infected females (figure  
263 2.D). On the other hand, progeny early-life fecundity was compromised only in case  
264 of progeny of *Sm*-infected females; progeny of *Bt*- and *Pa*-infected females had  
265 fecundity comparable to progeny of uninfected females (figure S1).

266 (c) Females that succumb to infection exhibit greater variability in reproductive output,  
267 compared to control females and females that survive the infection, irrespective of the  
268 pathogen used for infection (figures 3.B, 3.E, and 3.H). This variability in  
269 reproductive output is not explained by time of death in *Pa*- and *Sm*-infected female

270 (figures 3.F and 3.I); for *Bt*-infected females there is a negative correlation between  
271 time of death and *standardised* reproductive output, but with a very low effect size  
272 (figure 3.C). Females that survive the infection have reproductive output comparable  
273 to controls in terms of both mean and variance (comparison possible for *Bt*-infected  
274 females only).

275 Forbes [18] classified host-pathogen systems based on whether acute infection had any  
276 negative effect on current reproduction (possibly due to somatic damage to the reproductive  
277 tissue or leeching of resources) and future reproductive potential (brought about by host death  
278 or permanent somatic damage) of the host. Increased reproductive output is the predicted  
279 outcome only if future reproductive potential is compromised, but without any negative effect  
280 on current reproduction [18]. An observed reduction in reproductive output during acute  
281 infection can thus be because of (a) pathogen leeching resources from the host or  
282 manipulating host physiology to reduce fecundity [12], (b) damage to reproductive tissue by  
283 the pathogen [24] or by the host immune defence itself [14], or (c) rerouting of resources  
284 meant for reproduction towards immune defence by the host [31]; although such reallocation  
285 of resources in either direction may not always translate into greater fitness benefits [19].

286 Amongst the three pathogens used in this study, infection with two (*Pa* and *Sm*), is absolutely  
287 lethal, while about half of females infected with *Bt* survive acute infection (figure 2.A).  
288 Therefore, *Sm*- and *Pa*-infected females have zero future reproductive potential, while *Bt*-  
289 infected females can continue to reproduce post-recovery, assuming that there is no lingering  
290 somatic damage. *Drosophila melanogaster* flies never clear out infecting pathogens from  
291 their system completely [36], and a chronic, low level of pathogens continue to persist within  
292 the fly body, which requires some investment into immune function on part of the host to  
293 keep in check [33]. It is therefore a possibility that *Bt*-infected females may never regain  
294 uninfected levels of reproduction even post-recovery, but given that *Bt*-infected females that

295 survive the infection continue to reproduce at levels of control females even during acute  
296 infection period (figure 3.B), this is an unlikely possibility. *Bt*-infected females should  
297 therefore invest towards immune defence and not towards increasing immediate reproductive  
298 output, to maximise chances of survival and opportunity of future reproduction, as we see in  
299 the results from our experiment (figure 2.B and 2.C).

300 Based on the arguments outlined above it is expected that females would increase their  
301 reproductive effort after being infected with *Sm* and *Pa*, but we observe an increase in  
302 reproductive output only in case of *Sm*-infected females (figure 2.B and 2.C). The absence of  
303 any change in reproductive output of *Pa*-infected females may be driven by many possible  
304 reasons, including damage to reproductive tissue, and exploitation or manipulation of host by  
305 the pathogen; we rule out resource reallocation driven costs since we have argued above that  
306 when infection guarantees lethality, investment away from reproduction is counter-  
307 productive. Since we directly did not measure damage to reproductive tissue, we cannot  
308 choose with sanguinity between the different possibilities listed above based on the data at  
309 hand.

310 Progeny of infected females, independent of the infecting pathogen suffered from reduced  
311 pre-adult viability; progeny of *Pa*-infected females exhibited the greatest reduction (figure  
312 2.D). Perrin et al [37] have proposed that when *maternal* infection compromises progeny  
313 viability, increasing progeny production is not a suitable strategy for an infected host; this  
314 may be another explanation for why *Pa*-infected females do not increase reproductive output  
315 despite of guaranteed lethality due to infection. Reduced viability of progeny of *Pa*-infected  
316 females have been reported in other previous studies (viz. [38]; but see [23]). Reduced  
317 progeny viability can lead to a progeny quantity vs. progeny quality trade-off [2], making  
318 investment into progeny quality, instead of increasing progeny number, a potential strategy  
319 for *Pa*-infected females.

320 Infection with *Pa* has been previously demonstrated to both increase [23] and suppress [25]  
321 reproduction in females. A host's response to the same pathogen can change because of the  
322 route of infection [22, 29], which can be a possible reason behind different observations in  
323 different studies: Hudson et al [23] infected flies via oral route, while in this study and in that  
324 of Linder and Promislow [25] flies were infected via septic injury to the thorax. A systemic  
325 infection is more likely to reach the reproductive tissues, via the haemolymph, than an oral  
326 infection, which first has to colonise the gut and breach the gut lining to enter into circulation.

327 Infected females that died of infection, irrespective of the pathogen used for infection,  
328 exhibited greater inter-individual variability in reproductive output compared to control  
329 (sham-infected) females and females that survived the infection (figures 3.B, 3E, and 3.H).

330 The observed difference in the mean reproductive outputs of the infected and control females  
331 remained consistent across both experiments, suggesting that pathogen identity is a reliable  
332 predictor of post-infection reproductive output at the population level. Females that survived  
333 the infection with *Bt* had reproductive output similar to that of controls (figure 3.B), in terms  
334 of both population mean and inter-individual variability, suggesting that infected females  
335 may be able to judge their own prognosis and invest into reproduction accordingly. Since no  
336 females infected with either *Pa* or *Sm* survived the infection, we cannot conclude if this  
337 observation is generalizable for all other pathogens for which mortality is less than hundred  
338 percent. What seems puzzling therefore is why don't females that succumb to infection,  
339 irrespective of pathogen identity, increase their reproductive output?

340 Based on the earlier discussion, individual females that succumb to infection are expected to  
341 increase their reproductive output. This increase should happen irrespective of pathogen  
342 identity, driven only by the risk of mortality, except in a case where infection compromises  
343 current reproductive capacity. Contrary to this expectation, we see that the reproductive  
344 output of infected-dead females for each pathogen ranges from zero to extremely high values;



345 with some females reproducing less compared to the controls and other reproducing far more  
346 in excess (figures 3.B, 3E, and 3.H). Therefore, in canonical sense, we see some females  
347 exhibiting ‘cost of immunity’ while other females exhibiting ‘fecundity compensation’ when  
348 infected with the very same pathogen. This variation in reproductive output seems to be  
349 independent of both pathogen identity and time of death.

350 The observed inter-individual variability in reproductive output of females that die of  
351 infection may purely be stochastic, without any consequence in terms of evolutionary  
352 outcomes [39]. Alternatively, the heterogeneity may reflect variation in individual female  
353 quality [40] and physiological state [41]. The physiological state of an individual is a potent  
354 predictor of its residual reproductive value, and all else being equal, can therefore influence  
355 infection-induced changes in reproductive effort [42]. A third possibility is that the  
356 heterogeneity is a consequence of host variation, genetic or otherwise, in response to  
357 infection, in terms of both resistance and tolerance [15, 27, 32, 43]. Further empirical  
358 exploration is necessary to disentangle these potential causes of inter-individual variation.

359 To summarize, we find that lethal infections do not always induce an increased investment  
360 towards immediate reproduction in female *Drosophila melanogaster*; females infected with  
361 only one out of two pathogens that imposed hundred percent mortality increased their  
362 reproductive effort. Furthermore, females dying of infection do not have greater reproductive  
363 effort compared to females that survive the infection, and reproductive effort had a negative  
364 correlation with time of death in case only one out of three pathogens used in this study.

365 These findings suggest that the mechanistic interaction between a host and a pathogen has a  
366 greater influence on host reproductive effort, compared to infection status, infection outcome,  
367 and mortality risk on the host by the pathogen. Additionally, our results suggest that pathogen  
368 identity is a reliable predictor of bacterial infection induced change in reproductive effort of  
369 the females at the level of population means, but pathogen identity does not predict

370 reproductive output of individual females. Females infected with all three pathogens used in  
371 this study have overlapping range of reproductive output. Furthermore, maternal infection  
372 can affect progeny life-history traits, but the effect is specific to individual traits. In  
373 conclusion, dichotomy of ‘cost of immunity’ versus ‘fecundity compensation’ is too narrow  
374 in scope to account for all nuances involved in post-infection change in reproductive effort.

## 375 MATERIALS AND METHODS

### 376 **Host population and general handling**

377 Flies from BRB2 population - a large, lab adapted, out-bred population of *Drosophila*  
378 *melanogaster* - was used for the experiments reported in this paper. The Blue Ridge Baseline  
379 (BRB) populations were originally established by hybridizing 19 wild-caught iso-female lines  
380 [44], and has been maintained since then as an outbred population on a 14-day discrete  
381 generation cycle with census size of about 2800 adults each generation. Every generation,  
382 eggs are collected from population cages (plexiglass cages: 25 cm length × 20 cm width × 15  
383 cm height) and dispensed into vials (25 mm diameter × 90 mm height) with 8 ml banana-  
384 jaggery-yeast food medium, at a density of 70 eggs per vial. 40 such vials are set up; the day  
385 of egg collection is demarcated as day 1. The vials are incubated at 25 °C, 50-60% RH, 12:12  
386 hour LD cycle; under these conditions the egg-to-adult development time for these flies is  
387 about 9-10 days. On day 12 post egg collection all adults are transferred to population cage,  
388 and provided with fresh food plates (banana-jaggery-yeast food medium in a 90 mm Petri  
389 plate) supplemented with *ad libitum* live yeast paste. On day 14, the cage is provided with  
390 fresh food plate, and 18 hours later eggs are collected from this plate to begin the next  
391 generation.

392

### 393 **Pathogen handling and infection protocol**

394 Three bacterial pathogens were used in this study for infecting the flies: *Bacillus*  
395 *thuringiensis* (*Bt*; obtained from DSMZ, Germany, catalogue number: DSM2046),  
396 *Pseudomonas aeruginosa* (*Pa*; obtained from MTCC, India), and *Serratia marcescens* (*Sm*;  
397 [29]). All three pathogens are maintained in the lab as glycerol stocks, and are cultured in  
398 Luria Bertani broth (Himedia, M1245); cultures are incubated at 30 °C for *Bt*, and 37 °C for

399 *Pa* and *Sm*. Overnight culture of bacteria grown from glycerol stocks was diluted (1:100) in  
400 fresh LB medium and incubated till confluency (optical density OD<sub>600</sub> = 1.0-1.2). The  
401 bacterial cells were pelleted down by centrifugation and re-suspended in sterile 10 mM  
402 MgSO<sub>4</sub> buffer at OD<sub>600</sub> = 1.0. Flies were infected by pricking them at the dorsolateral side of  
403 the thorax with a fine needle (Minutien pin, 0.1 mm, Fine Science Tools, CA, item no.  
404 26001-10) dipped in bacterial suspension under light CO<sub>2</sub> anesthesia. Flies for sham-  
405 infections were similarly treated, but pricked with needle dipped in sterile 10 mM MgSO<sub>4</sub>  
406 buffer. Uninfected control flies were only subjected to CO<sub>2</sub> anesthesia.

407

#### 408 **Generation of experimental flies**

409 Eggs were collected from BRB2 population cages and distributed into food vials with 8 ml of  
410 standard food medium at a density of 70 eggs per vial. These vials were incubated as per  
411 general maintenance. Twelve days post egg-laying flies were flipped into fresh food vials and  
412 hosted for two more days before experimentation. This ensured all focal females were 4-5  
413 day old, sexually mature and inseminated, at the time of infections. Flies were again flipped  
414 into fresh food vials 6 hours before being subjected to experimental treatments (as described  
415 below).

416

#### 417 **Experimental design**

418 **Experiment 1.** Focal females were randomly distributed into five treatments: (a) infected  
419 with *Bacillus thuringiensis* (*Bt*), (b) infected with *Pseudomonas aeruginosa* (*Pa*), (c) infected  
420 with *Serratia marcescens* (*Sm*), (d) sham-infected controls, and (e) uninfected controls. The  
421 entire experiment was independently replicated thrice. Flies were placed in fresh food vials  
422 after being subjected to respective treatments. For each treatment 10 vials were set up, each

423 with 8 females for oviposition; each vial was used as a unit of replication. The vials were  
424 monitored every 2 hours to record any mortality, for 24 hours post-infection, divided into two  
425 consecutive 12-hour windows. Flies alive at the end of first 12-hour window were flipped  
426 into fresh food vials (one-to-one mapping of vial identity), and flies alive at the end of 24  
427 hours were discarded (censored). The number of eggs in each vial was counted at the end of  
428 respective 12-hour windows. The vials were then incubated under standard maintenance  
429 conditions for the eggs to develop into adults, and 12 days after the oviposition period, all  
430 adult progeny were counted under light CO<sub>2</sub> anesthesia and transferred to fresh food vials.

431 *Standardized reproductive output* of females in each vial was calculated as,

432 
$$\text{Standardized egg count} = \frac{\text{Total number of eggs layed over 24 hours}}{\text{Summation of lifespan of all females in the vial}}, \text{ and}$$

433 
$$\text{Standardized progeny count} = \frac{\text{Total number of adult progeny produced}}{\text{Summation of lifespan of all females in the vial}}.$$

434 Standardization was carried out to account for the differences in post-infection survival time  
435 of females in various treatments (see RESULTS for more details). *Progeny pre-adult viability*  
436 for each vial was calculated as,

437 
$$\text{Pre adult viability} = \frac{\text{Total number of adult progeny produced}}{\text{Total number of eggs laid}}.$$

438 Following progeny counts, 4-5-day old adult progeny were pooled together according to  
439 treatments and distributed to fresh food vials with 5 females and 5 males in each vial; 10 such  
440 vials were set up per *maternal* treatment per replicate. These flies were allowed to oviposit  
441 for six consecutive days (by flipping them into fresh food vials every day) to obtain an  
442 estimate of *offspring early-life fecundity*. These vials were incubated at standard maintenance  
443 conditions, and the number of progeny in these vials were counted 12 days post-oviposition.

444 **Experiment 2.** Focal females were randomly distributed into two treatments: (a) infected  
445 with bacteria, and (b) sham-infected controls. For infected treatment, 120 females were  
446 individually hosted in vials for oviposition, while for sham-infected controls 40 females were  
447 hosted individually. The experiment was replicated thrice with each pathogen. (Due to a  
448 handling accident, one replicate with Sm had sample size of 60 and 30 females for infected  
449 and sham-infected treatments, respectively.) The vials were monitored every 2 hours for any  
450 mortality, for 48 hours post-infection, after which the alive flies were discarded. The vials  
451 were then incubated under standard maintenance conditions for the eggs to develop into  
452 adults, and 12 days later the number of adult progeny was counted for each individual female.

453 *Standardized reproductive output* for each individual female was calculated as,

454 
$$\text{Standardized progeny count} = \frac{\text{Number of offspring produced}}{\text{Lifespan of the female in the vial}}$$

455

## 456 **Statistical analysis**

457 All analyses were carried out using R statistical software (version 4.1.0 [45]), using various  
458 functions from the *survival* [46], *coxme* [47], *lmerTest* [48], *emmeans* [49], and *car* [50]  
459 packages. Graphs were created using the *ggplot2* [51] and *survminer* [52].

460 **Experiment 1.** Survival data was analyzed using mixed-effects Cox proportional hazards  
461 model, with ‘Treatment’ as a fixed factor and ‘Replicate’ as a random factor. Reproductive  
462 output, progeny viability, and progeny early-life fecundity was modeled using linear models  
463 (as described below) and subjected to significance testing using type III analysis of variance  
464 (ANOVA). Post-hoc pairwise comparisons, wherever necessary, was carried using Tukey’s  
465 HSD method.

466 Standardized egg count ~ Treatment + (1|Replicate)

467 Standardized progeny count ~ Treatment + (1|Replicate)

468 Progeny pre-adult viability ~ Maternal treatment + (1|Replicate)

469 Progeny early-life fecundity ~ Day + Maternal treatment + (1|Replicate)

470 Significance tests for random effects are tabulated in table S1.

471 **Experiment 2.** Reproductive output data was modeled using a linear model (as described  
472 below) and subjected to significance testing using type III ANOVA. Post-hoc pairwise  
473 comparisons, wherever necessary, was carried using Tukey's HSD method.

474 Standardized progeny count ~ Category + (1|Replicate)

475 'Category' denoted the combination of infection status and infection outcome, and consists of  
476 three levels: sham-infected females, infected-alive females, and infected-dead females. Effect  
477 of time on death on reproductive output of infected-dead females was similarly analyzed with  
478 type III ANOVA using the following linear model:

479 Standardized progeny count ~ Time of death + (1|Replicate)

480 Significance tests for random effects are tabulated in table S1. Comparison of variances  
481 across 'category' was carried out using Levene's test after pooling data from all three  
482 replicates for each pathogen.

483 FIGURES

484 **Figure 1.** Experimental design for testing the effect of (A) pathogen identity, and (B)  
485 infection outcome and individual variability, on post-infection reproductive output of  
486 *Drosophila melanogaster* females.

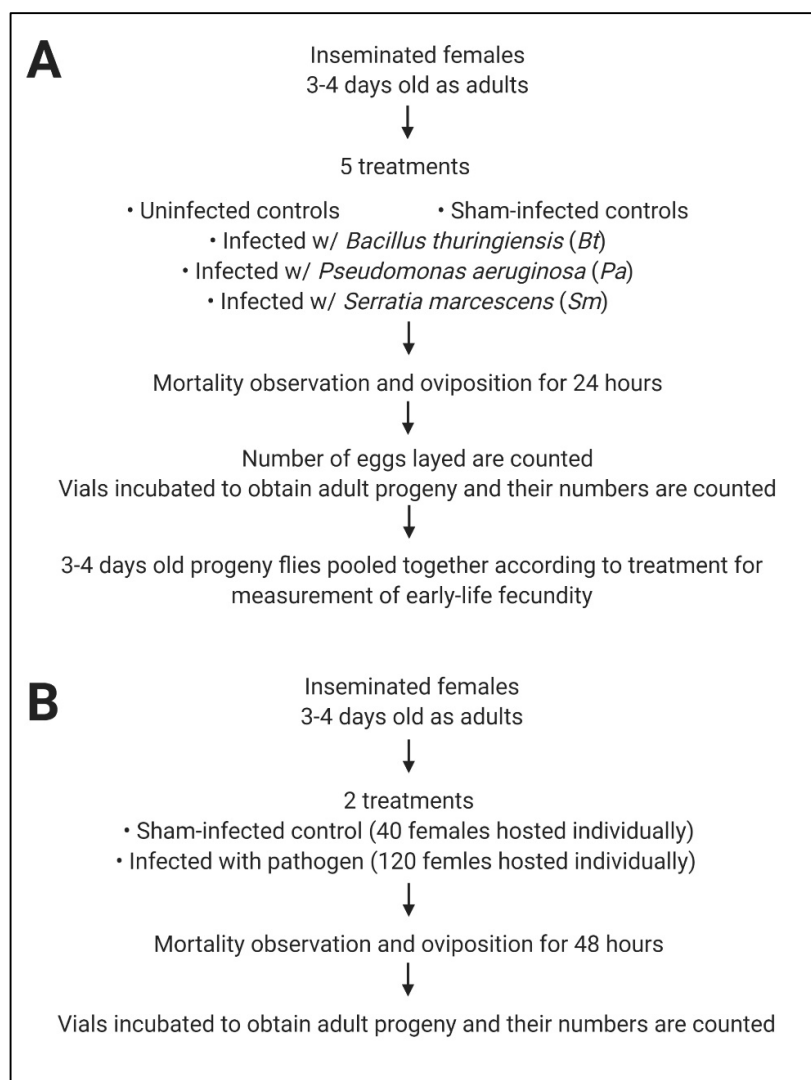

487



488 **Figure 2.** Effect of infection with different pathogens on (A) survival, (B) number of eggs  
489 produced, (C) number of progeny produced, and (D) pre-adult viability of progeny, of  
490 *Drosophila melanogaster* females.

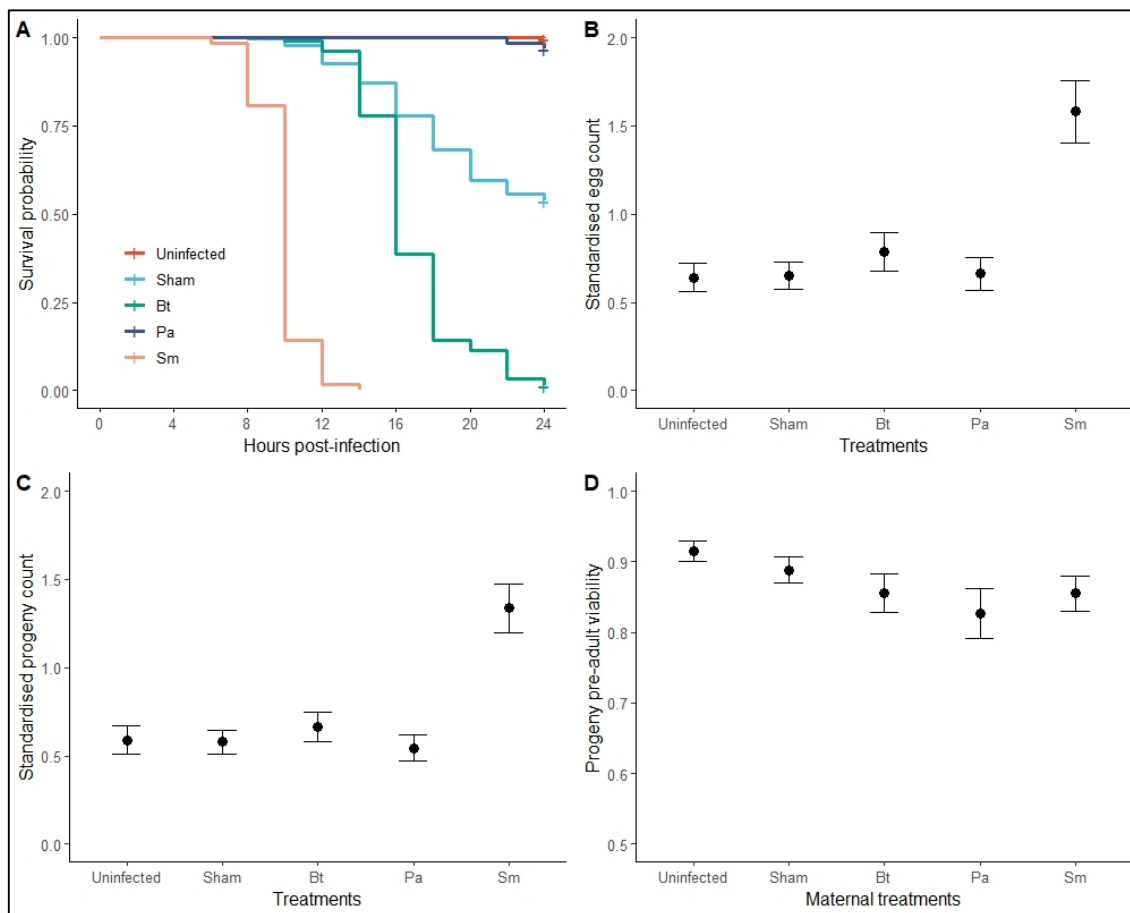

491

492

493 **Figure 3.** Effect of infection outcome on post-infection reproductive output of *Drosophila*  
494 *melanogaster* females, infected with *Bacillus thuringiensis* (A: survival, B: effect of infection  
495 outcome on progeny count, C: effect of time of death on progeny count), *Pseudomonas*  
496 *aeruginosa* (D: survival, E: effect of infection outcome on progeny count, F: effect of time of  
497 death on progeny count), and *Serratia marcescens* (G: survival, H: effect of infection  
498 outcome on progeny count, I: effect of time of death on progeny count).

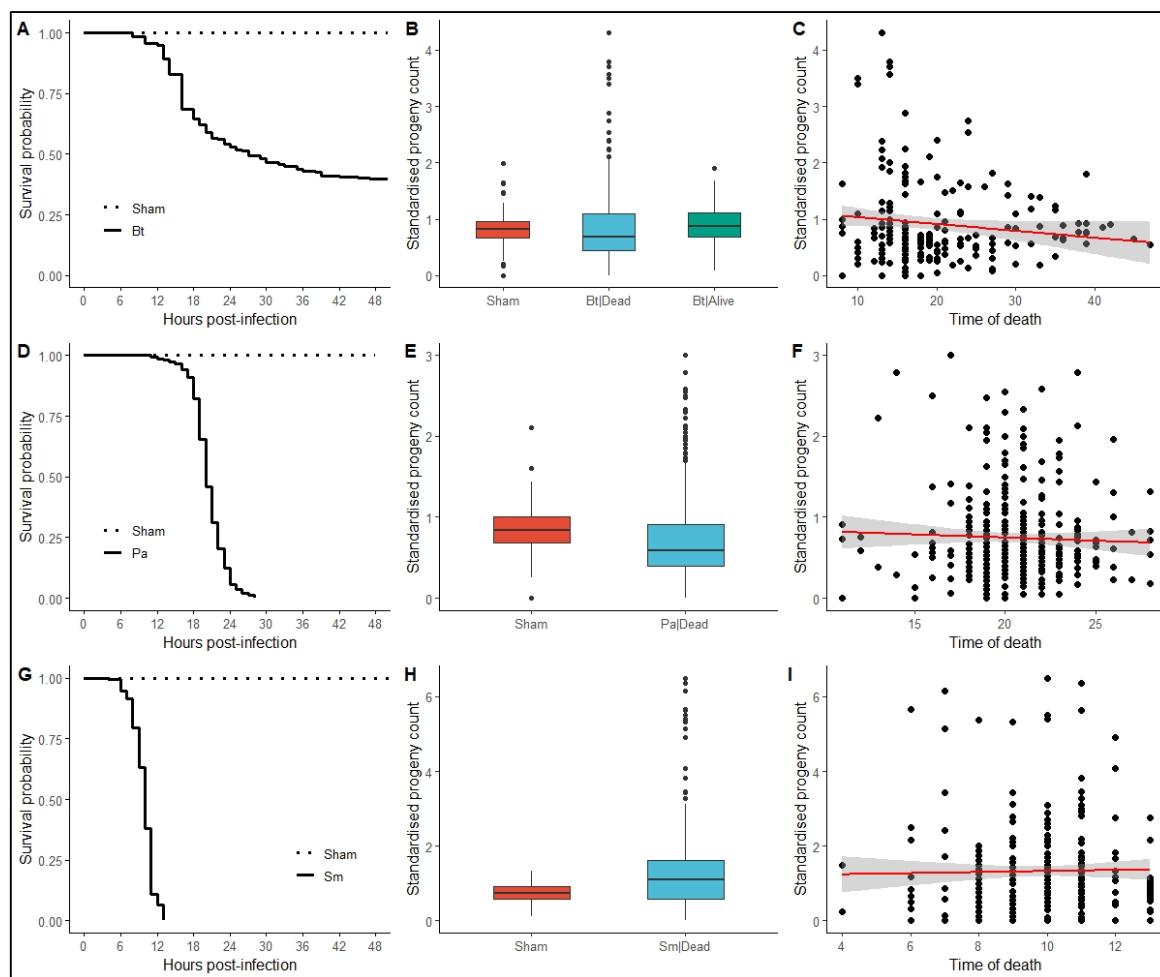

499  
500

501 REFERENCES

- 502 1. Parker BJ, Barribeau SM, Laughton AM, de Roode JC, Gerardo NM. Non-  
503 immunological defense in an evolutionary framework. *Trends in ecology & evolution*.  
504 2011 May 1;26(5):242-8.
- 505 2. Stearns SC. Trade-offs in life-history evolution. *Functional ecology*. 1989 Jan  
506 1;3(3):259-68.
- 507 3. Fisher RA. *The genetical theory of natural selection*. Oxford: Clarendon Press;  
508 London: Oxford University Press. 1930
- 509 4. Williams GC. Pleiotropy, Natural Selection, and the Evolution of Senescence:  
510 *Evolution*. 1957;11, 398-411.
- 511 5. Williams GC. Natural selection, the costs of reproduction, and a refinement of Lack's  
512 principle. *The American Naturalist*. 1966 Nov 1;100(916):687-90.
- 513 6. Clutton-Brock TH. Reproductive effort and terminal investment in iteroparous  
514 animals. *The American Naturalist*. 1984 Feb 1;123(2):212-29.
- 515 7. Minchella DJ. Host life-history variation in response to parasitism. *Parasitology*. 1985  
516 Feb;90(1):205-16.
- 517 8. Minchella DJ, Loverde PT. A cost of increased early reproductive effort in the snail  
518 *Biomphalaria glabrata*. *The American Naturalist*. 1981 Dec 1;118(6):876-81.
- 519 9. Sheldon BC, Verhulst S. Ecological immunology: costly parasite defences and trade-  
520 offs in evolutionary ecology. *Trends in ecology & evolution*. 1996 Aug 1;11(8):317-  
521 21.
- 522 10. Lochmiller RL, Deerenberg C. Trade-offs in evolutionary immunology: just what is  
523 the cost of immunity? *Oikos*. 2000 Jan;88(1):87-98.
- 524 11. Schmid-Hempel P. Evolutionary ecology of insect immune defenses. *Annu. Rev.*  
525 *Entomol.*. 2005 Jan 7;50:529-51.
- 526 12. Hurd H. Host fecundity reduction: a strategy for damage limitation?. *Trends in*  
527 *parasitology*. 2001 Aug 1;17(8):363-8.
- 528 13. Frank SA, Schmid-Hempel P. Mechanisms of pathogenesis and the evolution of  
529 parasite virulence. *Journal of evolutionary biology*. 2008 Mar;21(2):396-404.
- 530 14. Sadd BM, Siva-Jothy MT. Self-harm caused by an insect's innate immunity.  
531 *Proceedings of the Royal Society B: Biological Sciences*. 2006 Oct  
532 7;273(1600):2571-4.
- 533 15. Råberg L, Graham AL, Read AF. Decomposing health: tolerance and resistance to  
534 parasites in animals. *Philosophical Transactions of the Royal Society B: Biological*  
535 *Sciences*. 2009 Jan 12;364(1513):37-49.
- 536 16. Howick VM, Lazzaro BP. Genotype and diet shape resistance and tolerance across  
537 distinct phases of bacterial infection. *BMC evolutionary biology*. 2014 Dec;14(1):1-3.
- 538 17. Moret Y, Schmid-Hempel P. Survival for immunity: the price of immune system  
539 activation for bumblebee workers. *Science*. 2000 Nov 10;290(5494):1166-8.
- 540 18. Forbes MR. Parasitism and host reproductive effort. *Oikos*. 1993 Sep 1:444-50.
- 541 19. Javoš J. A two-resource model of terminal investment. *Theory in Biosciences*. 2013  
542 Jun;132(2):123-32.

- 543 20. Carton Y, David JR. Reduction of fitness in *Drosophila* adults surviving parasitization  
544 by a cynipid wasp. *Experientia*. 1983 Feb;39(2):231-3.
- 545 21. Fellowes MD, Kraaijeveld AR, Godfray HC. The relative fitness of *Drosophila*  
546 *melanogaster* (Diptera, Drosophilidae) that have successfully defended themselves  
547 against the parasitoid *Asobara tabida* (Hymenoptera, Braconidae). *Journal of*  
548 *Evolutionary Biology*. 1999;12(1):123-8.
- 549 22. Gupta V, Vasanthakrishnan RB, Siva-Jothy J, Monteith KM, Brown SP, Vale PF. The  
550 route of infection determines *Wolbachia* antibacterial protection in *Drosophila*.  
551 *Proceedings of the Royal Society B: Biological Sciences*. 2017 Jun  
552 14;284(1856):20170809.
- 553 23. Hudson AL, Moatt JP, Vale PF. Terminal investment strategies following infection  
554 are dependent on diet. *Journal of Evolutionary Biology*. 2020 Mar;33(3):309-17.
- 555 24. Brandt SM, Schneider DS. Bacterial infection of fly ovaries reduces egg production  
556 and induces local hemocyte activation. *Developmental & Comparative Immunology*.  
557 2007 Jan 1;31(11):1121-30.
- 558 25. Linder JE, Promislow DE. Cross-generational fitness effects of infection in  
559 *Drosophila melanogaster*. *Fly*. 2009 Apr 15;3(2):143-50.
- 560 26. Kutzer MA, Armitage SA. The effect of diet and time after bacterial infection on  
561 fecundity, resistance, and tolerance in *Drosophila melanogaster*. *Ecology and*  
562 *evolution*. 2016 Jul;6(13):4229-42.
- 563 27. Kutzer MA, Kurtz J, Armitage SA. Genotype and diet affect resistance, survival, and  
564 fecundity but not fecundity tolerance. *Journal of evolutionary biology*. 2018  
565 Jan;31(1):159-71.
- 566 28. Stephenson JF. Parasite-induced plasticity in host social behaviour depends on sex  
567 and susceptibility. *Biology letters*. 2019 Nov 29;15(11):20190557.
- 568 29. Martins NE, Faria VG, Teixeira L, Magalhães S, Sucena É. Host adaptation is  
569 contingent upon the infection route taken by pathogens. *PLoS pathogens*. 2013 Sep  
570 26;9(9):e1003601.
- 571 30. Behrens S, Peuß R, Milutinović B, Eggert H, Esser D, Rosenstiel P, Schulenburg H,  
572 Bornberg-Bauer E, Kurtz J. Infection routes matter in population-specific responses of  
573 the red flour beetle to the entomopathogen *Bacillus thuringiensis*. *BMC genomics*.  
574 2014 Dec;15(1):1-7.
- 575 31. McKean KA, Yourth CP, Lazzaro BP, Clark AG. The evolutionary costs of  
576 immunological maintenance and deployment. *BMC evolutionary biology*. 2008  
577 Dec;8(1):1-9.
- 578 32. Vale PF, Little TJ. Fecundity compensation and tolerance to a sterilizing pathogen in  
579 *D. aphis*. *Journal of Evolutionary Biology*. 2012 Sep;25(9):1888-96.
- 580 33. Chambers MC, Jacobson E, Khalil S, Lazzaro BP. Consequences of chronic bacterial  
581 infection in *Drosophila melanogaster*. *PloS one*. 2019 Oct 24;14(10):e0224440.
- 582 34. Gupta V, Venkatesan S, Chatterjee M, Syed ZA, Nivsarkar V, Prasad NG. No  
583 apparent cost of evolved immune response in *Drosophila melanogaster*. *Evolution*.  
584 2016 Apr;70(4):934-43.
- 585 35. Hirshfield MF, Tinkle DW. Natural selection and the evolution of reproductive effort.  
586 *Proceedings of the national academy of sciences*. 1975 Jun 1;72(6):2227-31.

- 587 36. Duneau D, Ferdy JB, Revah J, Kondolf H, Ortiz GA, Lazzaro BP, Buchon N.  
588 Stochastic variation in the initial phase of bacterial infection predicts the probability  
589 of survival in *D. melanogaster*. *Elife*. 2017 Oct 12;6:e28298.
- 590 37. Perrin N, Christe P, Richner H. On host life-history response to parasitism. *Oikos*.  
591 1996 Mar 1:317-20.
- 592 38. Ye YH, Chenoweth SF, McGraw EA. Effective but costly, evolved mechanisms of  
593 defense against a virulent opportunistic pathogen in *Drosophila melanogaster*. *PLoS*  
594 *Pathogens*. 2009 Apr 17;5(4):e1000385.
- 595 39. Steiner UK, Tuljapurkar S. Neutral theory for life histories and individual variability  
596 in fitness components. *Proceedings of the National Academy of Sciences*. 2012 Mar  
597 20;109(12):4684-9.
- 598 40. Wilson AJ, Nussey DH. What is individual quality? An evolutionary perspective.  
599 *Trends in ecology & evolution*. 2010 Apr 1;25(4):207-14.
- 600 41. McNamara JM, Houston AI. State-dependent life histories. *Nature*. 1996  
601 Mar;380(6571):215-21.
- 602 42. Duffield KR, Bowers EK, Sakaluk SK, Sadd BM. A dynamic threshold model for  
603 terminal investment. *Behavioral ecology and sociobiology*. 2017 Dec;71(12):1-7.
- 604 43. Parker BJ, Garcia JR, Gerardo NM. Genetic variation in resistance and fecundity  
605 tolerance in a natural host–pathogen interaction. *Evolution*. 2014 Aug;68(8):2421-9.
- 606 44. Singh K, Kochar E, Prasad NG. Egg viability, mating frequency and male mating  
607 ability evolve in populations of *Drosophila melanogaster* selected for resistance to  
608 cold shock. *PloS one*. 2015 Jun 11;10(6):e0129992.
- 609 45. R Core Team (2021). R: A language and environment for statistical computing. R  
610 Foundation for Statistical Computing, Vienna, Austria.
- 611 46. Therneau T (2021). A Package for Survival Analysis in R. R package version 3.2-11.
- 612 47. Terry M. Therneau (2020). *coxme: Mixed Effects Cox Models*. R package version  
613 2.2-16.
- 614 48. Kuznetsova A, Brockhoff PB, Christensen RHB (2017). *lmerTest Package: Tests in*  
615 *Linear Mixed Effects Models*. *Journal of Statistical Software*, 82(13):1-26.
- 616 49. Russell V. Lenth (2021). *emmeans: Estimated Marginal Means, aka Least-Squares*  
617 *Means*. R package version 1.6.1.
- 618 50. John Fox and Sanford Weisberg (2019). *An {R} Companion to Applied Regression,*  
619 *Third Edition*. Thousand Oaks CA, Sage
- 620 51. H. Wickham. *ggplot2: Elegant Graphics for Data Analysis*. Springer-Verlag New  
621 York, 2016.
- 622 52. Alboukadel Kassambara, Marcin Kosinski and Przemyslaw Biecek (2021). *survminer:*  
623 *Drawing Survival Curves using 'ggplot2'*. R package version 0.4.9.

625 SUPPLEMENTARY FILES

626 **Figure S1.** Effect of *maternal* infection treatment on progeny early-life fecundity; fecundity  
627 measured on each day shown separately.

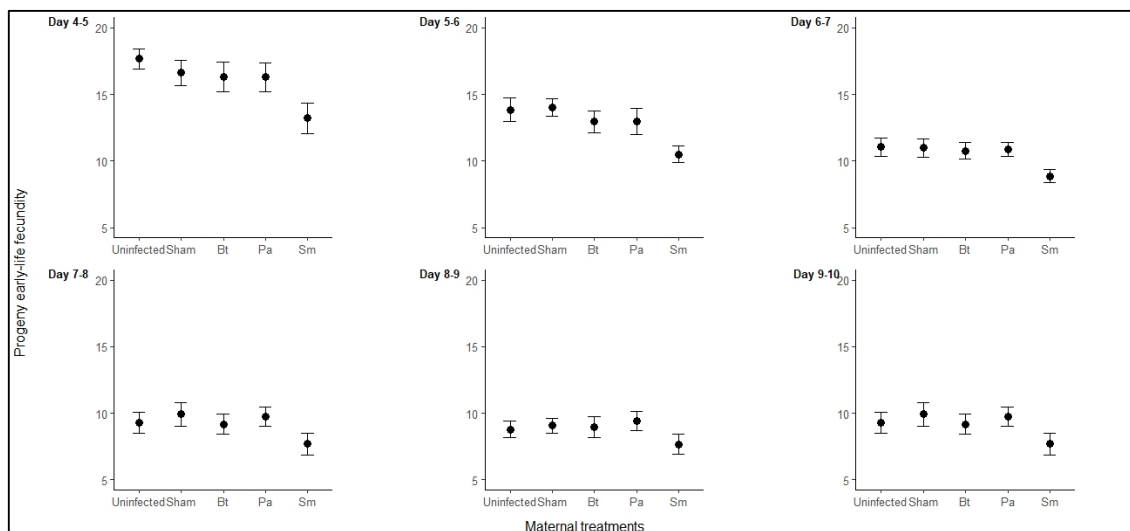

628

629 **Table S1.** Significance tests for random factors included in various type-III ANOVA  
630 reported in the 'Results' section. See 'Materials and Methods' for full details on statistical  
631 analysis.

632 **Table S2.** Post-hoc pairwise comparisons using Tukey's HSD for significant effects reported  
633 for fixed factors in various type-III ANOVA reported in the 'Results' section. See 'Materials  
634 and Methods' for full details on statistical analysis.
